# Supplementary material
Source: publisher figshare collection journal article supplement (https://frontiersin.figshare.com/ndownloader/files/23013530)
Supplement: Supplementary file [file 23013530]

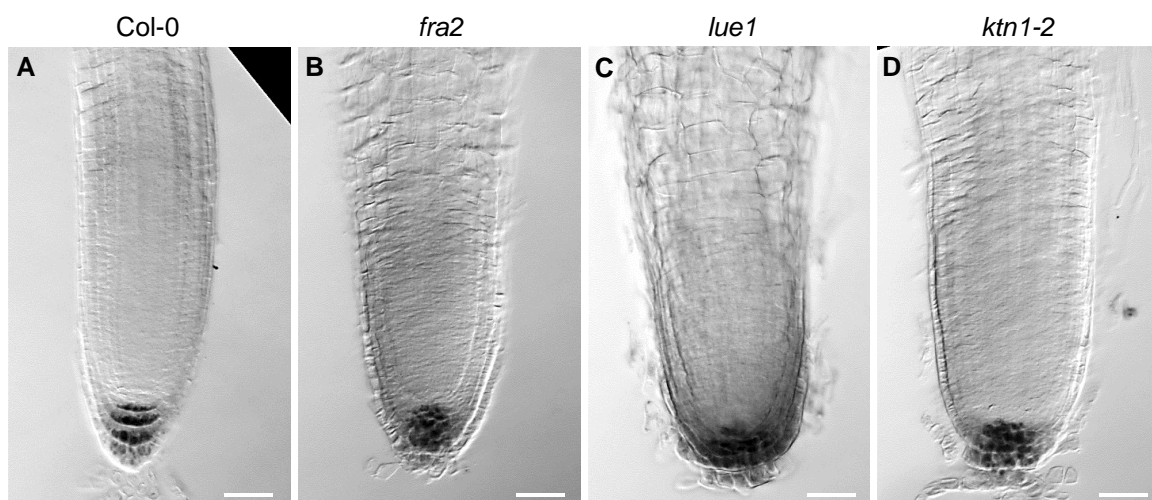

**Figure S1. Overview of root tip anatomy of *katanin1* mutants after fixation, clearing and staining with Lugol solution. (A-D) Structure of root cap and distribution of starch grains in columella cells in Col-0 (A), *fra2* mutant (B), *lue1* mutant (C) and *ktn1-2* mutant (D). Bar: (A-D) 500  $\mu$ m.**

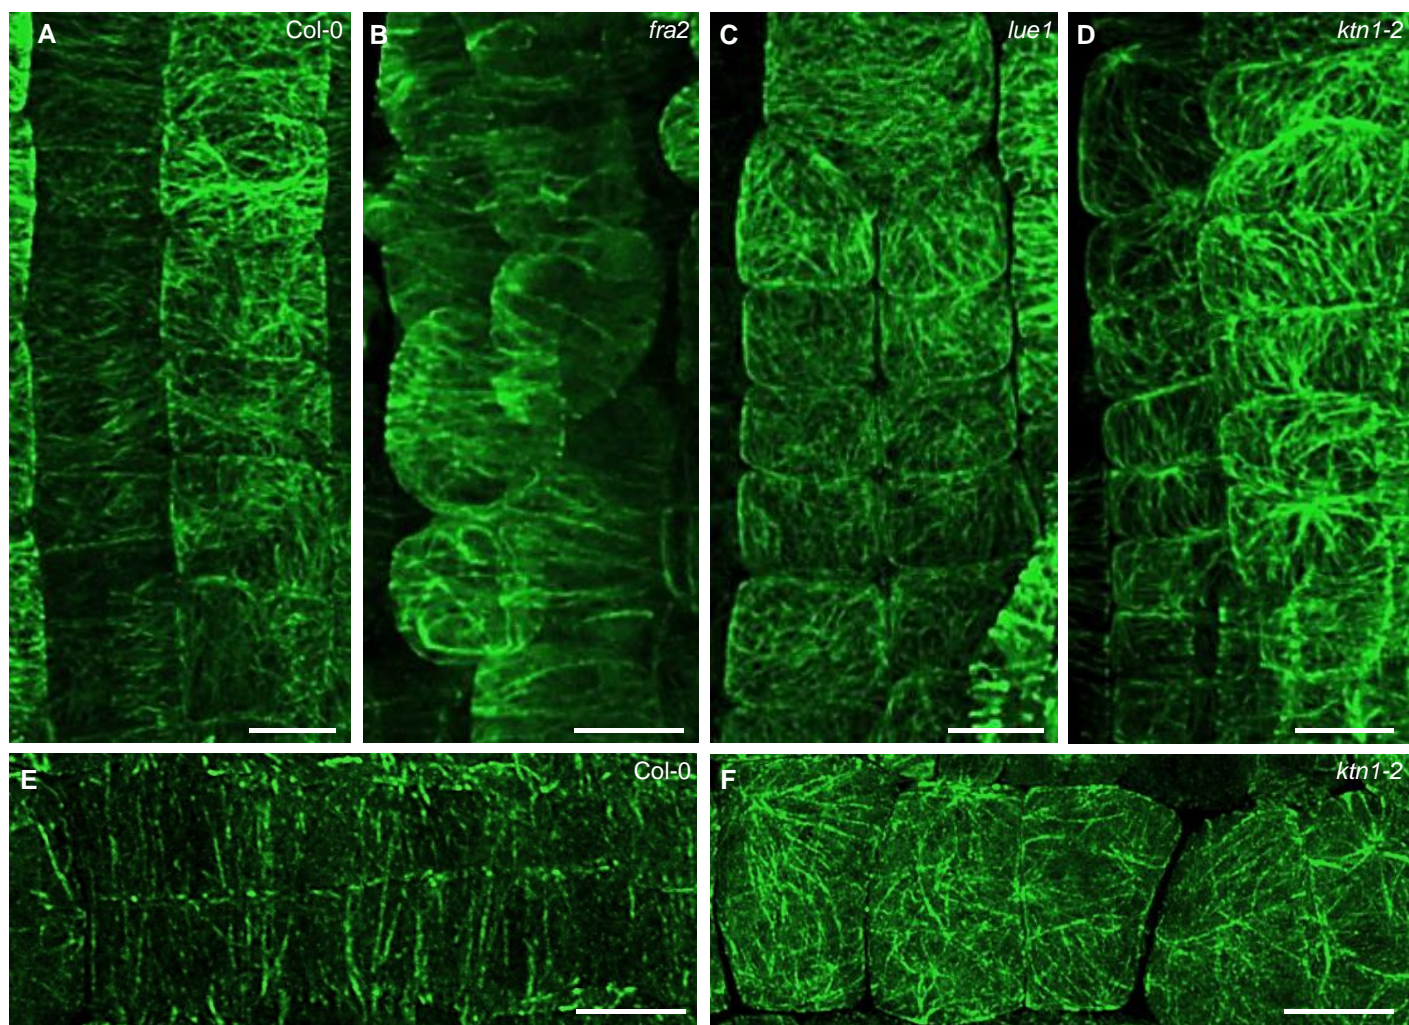

**Figure S2. Whole mount immunofluorescence localization of cortical microtubules in root epidermal cells of *Arabidopsis* wild type Col-0 and *katanin1* mutants.** (A-D) Group of root epidermal cells showing predominantly transverse and parallel organization of cortical microtubules in wild type Col-0 (A), less ordered transverse pattern of orientation in *fra2* (B) and more random non-regular orientations in *lue1* (C) and *ktn1-2* (D) mutants. (E-F) Cortical microtubules transversely oriented in wild type Col-0 (E) and randomly oriented in *ktn1-2* mutant (F) with respect to the root axis (in left-to-right direction). Microtubules in fixed samples were immunolocalized using anti- $\alpha$  tubulin primary and Alexa Fluor 488-conjugated secondary antibodies. Bar: (A-D) 10  $\mu$ m; (E-F) 5  $\mu$ m.



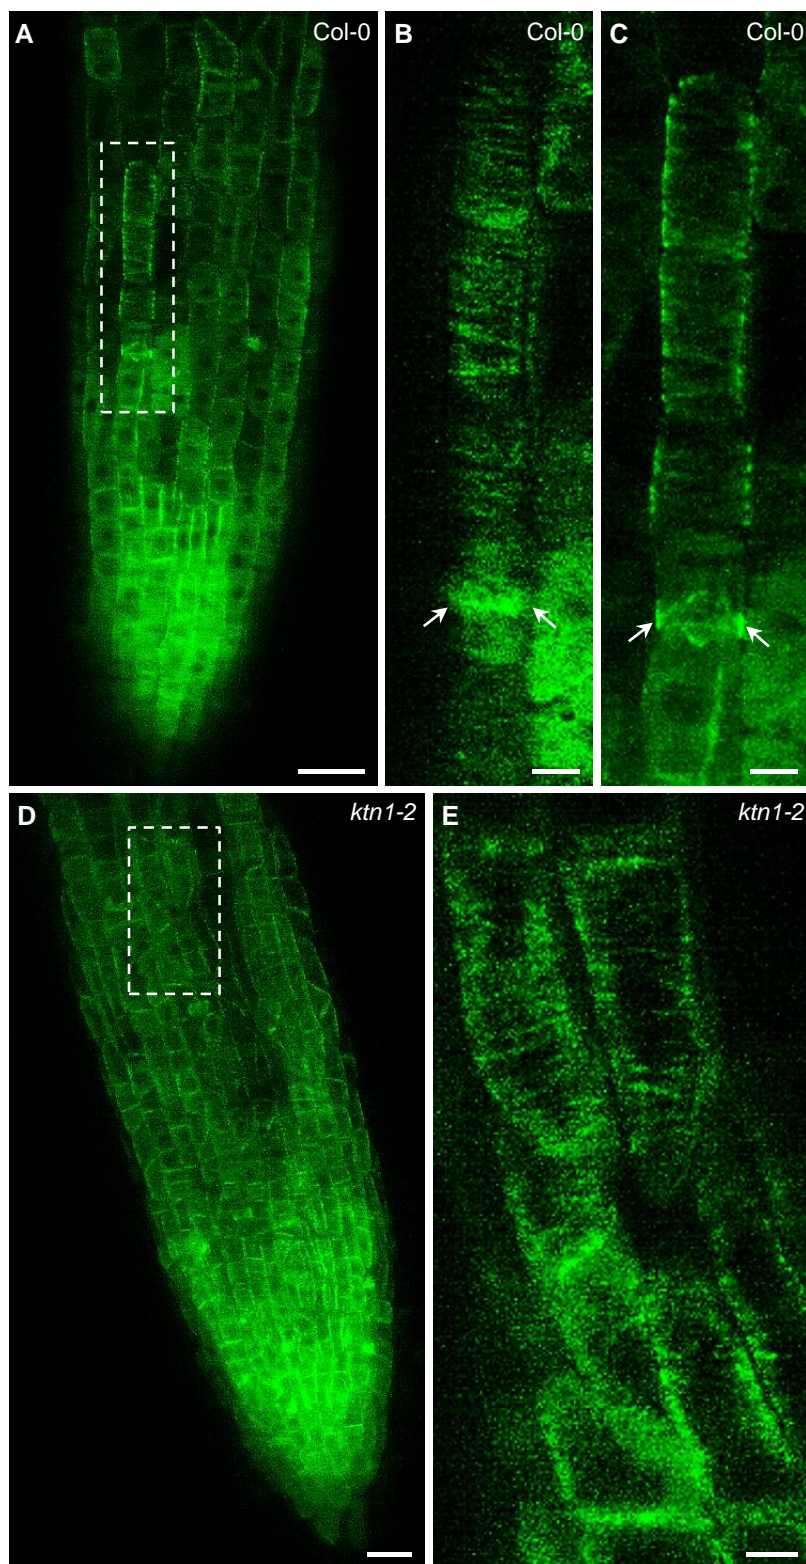

**Figure S3. Visualization of epidermis and lateral root cap in primary root of wild type Col-0 and *ktn1-2* mutant plants stably carrying a GFP-TUA6 microtubule marker using light-sheet microscopy.** (A-C) Microtubules in surface root cell layers of Col-0. Boxed area in (A) depicts lateral root cap cells showing cortical microtubules and PPB (arrows) in superficial (B) and median (C) optical sections. (D-E) Microtubules in surface root cell layers of *ktn1-2* mutant. Boxed area in (D) depicts lateral root cap cells showing cortical microtubules from individual optical sections (E). Bar: (A,D) 20 μm; (B,C,E) 5 μm.

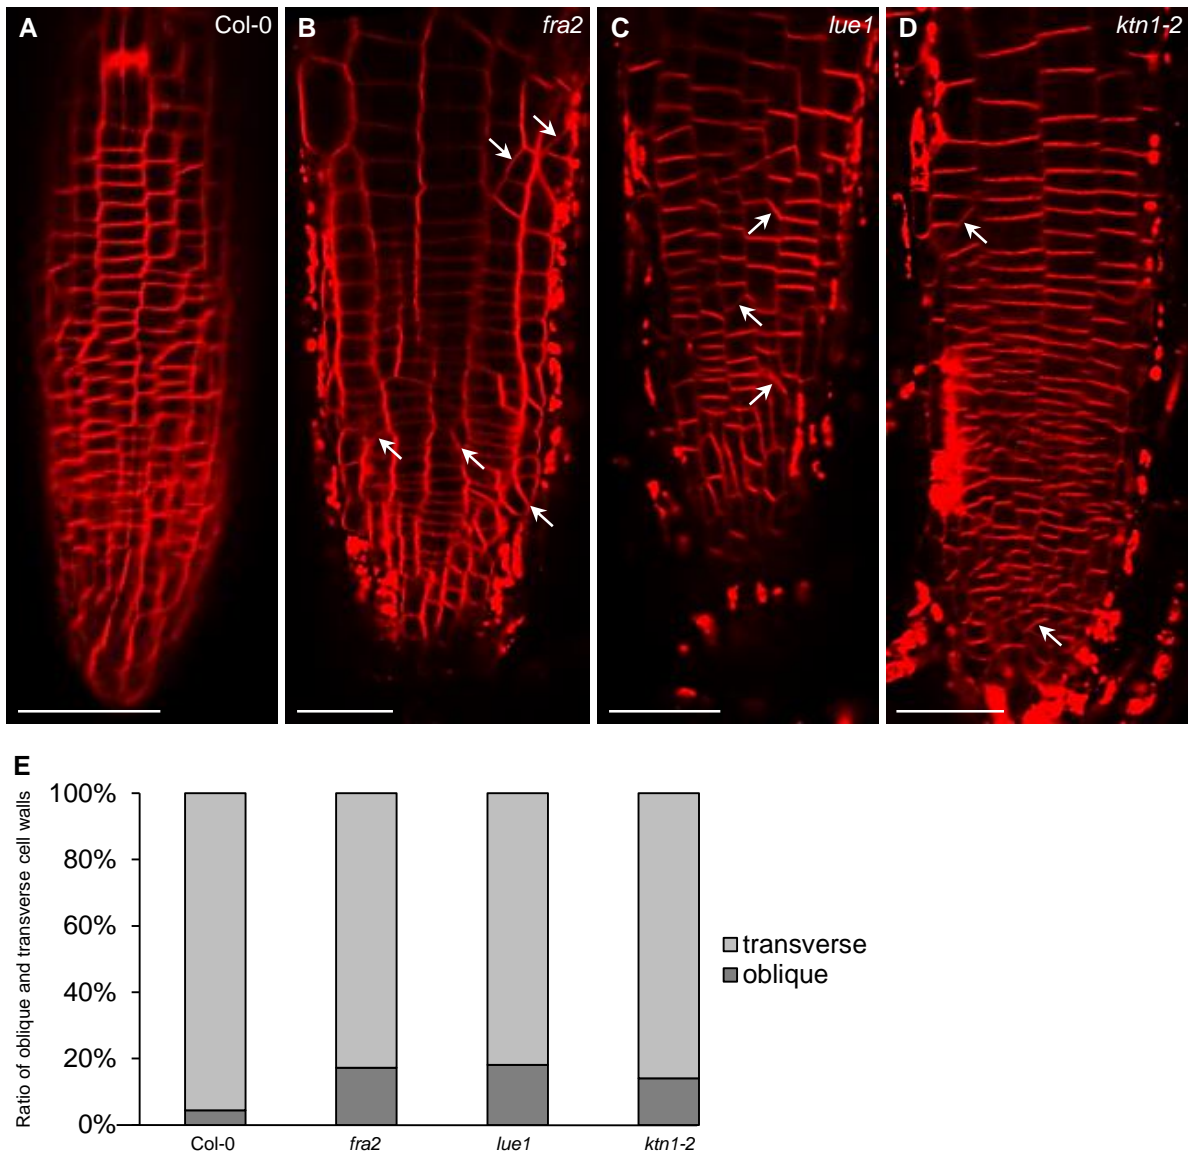

**Figure S4. Cell division plane orientation in root epidermis of Col-0 and *katanin1* mutants stained with FM4-64.** (A) Root epidermal cells of Col-0 seedlings showing a regular patterning. (B-D) Appearance of oblique cell divisions (arrows) in the root epidermis of *fra2* mutant (B), *lue1* mutant (C) and *ktn1-2* mutant (D) primary root. (E) Quantitative evaluation of oblique cell wall occurrence in epidermal cells of primary roots of Col-0 (n = 1273 cell walls), *fra2* (n = 1330 cell walls), *lue1* (n = 1321 cell walls) and *ktn1-2* (n = 1396 cell walls) mutants. Bars: (A-D) 50  $\mu$ m.



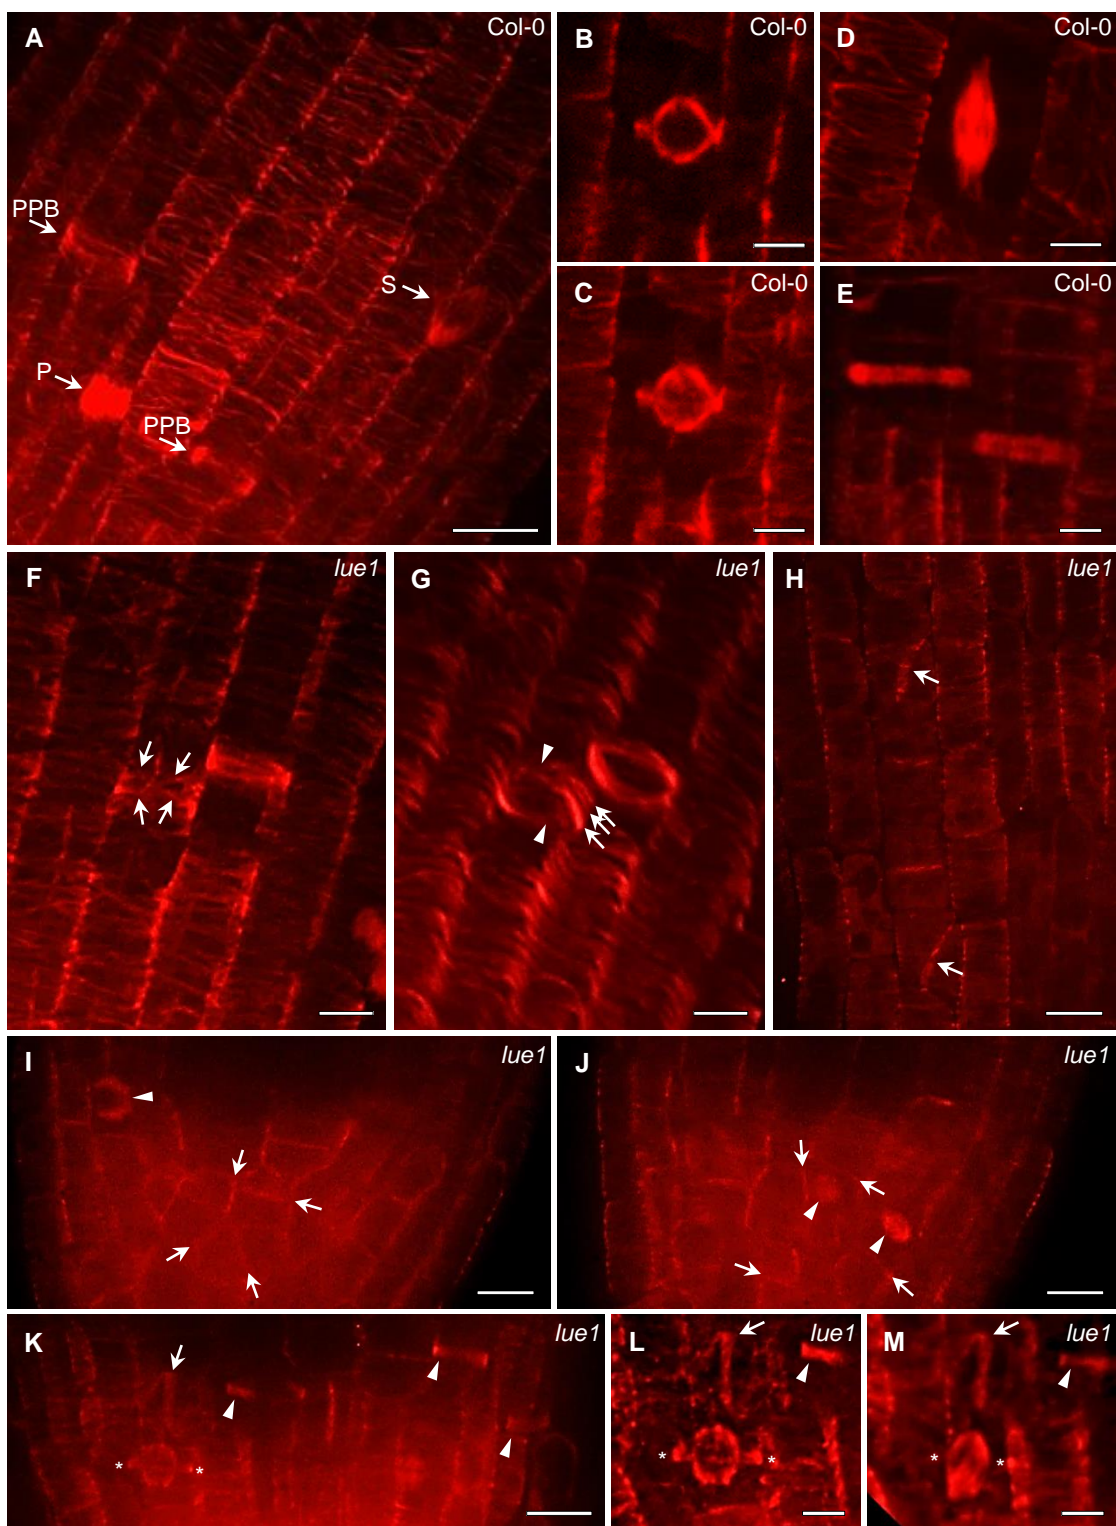

**Figure S5. Structural organization of microtubules in cells of the root apex in *lue1* mutants stably expressing a cauliflower mosaic virus 35S promoter-driven mCherry fusion of the TUA5 (35S::mCherry:TUA5).** (A-E) Expression of mCherry labelled TUA5 in transgenic Col-0 plants showing control root phenotype. Overview of microtubules in dividing and non-dividing root meristematic cells. Highlighted are microtubules of PPB (A-C), mitotic spindle (S; A,D) and phragmoplast (P; A,E) in dividing cells. Note the perpendicular orientation of PPB and phragmoplasts, and parallel orientation of mitotic spindles to the longitudinal root axis. (F-M) Expression of mCherry labelled TUA5 in transgenic *lue1* plants with short root phenotype. (F,G) Disorganized arrangement and orientation of microtubules in PPB in transgenic *lue1* plants. Microtubules had loosened organization and non-parallel microtubules were present (arrows; F). The structure of PPB was not complete (arrowheads; G) and it contained several individual rings (arrows; G). (H) Presence of oblique and shifted cross cell walls. (I,J) Microtubules in central columella cells of the root cap in transgenic *lue1* plants. Positions of abnormally shifted cell division planes are indicated by arrows (I,J). Arrowheads indicate phragmoplast in anticlinal cell division (I) and shifted mitotic spindles (J). (K-M) Presence of tilted and abnormally positioned PPB in meristematic cell (arrow) in transgenic *lue1* plants. Arrowheads indicate normally oriented PPBs (K-M). Asterisks indicate progression of the cell division from early prophase (K,L) to metaphase (M). Bars: (B-E,L,M) 5  $\mu$ m; (A,F-K) 10  $\mu$ m.

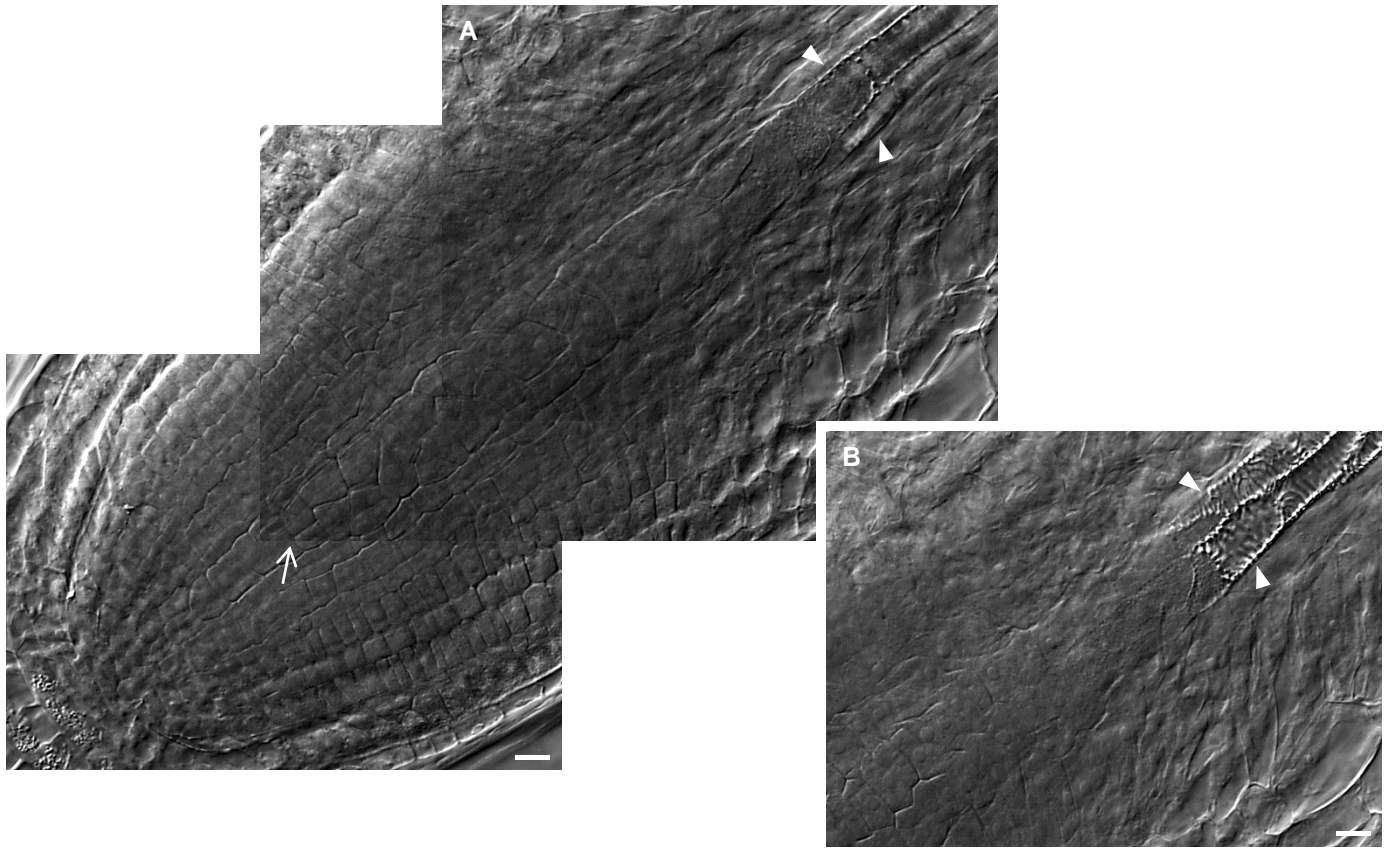

**Figure S6. Cell lineage of procambium cell file and differentiation of protoxylem files in the apex of primary root of *ktn1-2* mutant.** Sample from the clearing preparation showing duplication of protoxylem files (**A,B**, arrowheads). Cell file in the procambium contains cells with abnormal size, shape and position. Abnormal ectopic T-shaped longitudinal cell division is indicated by arrow (**A**). Bars: 10 μm.

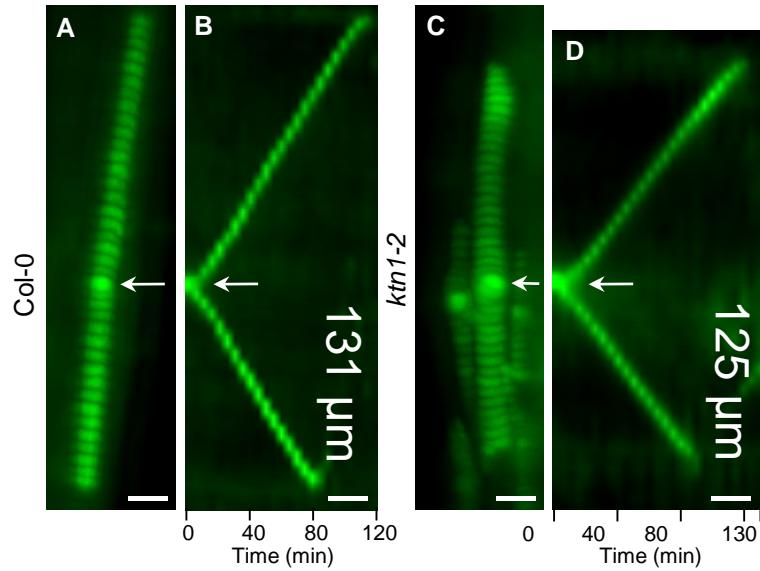

**Figure S7. Progression of one representative longitudinal cell division in the central cylinder at the region of first lateral root primordium formation in Col-0 and *ktn1-2* mutant plants stably expressing a GFP-TUA6 microtubule marker.** Speed of the cell divisions in Col-0 (A) and *ktn1-2* mutant (C) is visualized as time lapse maximum intensity projections (A,C) and depicted from kymographs (B,D). Arrows point to the place of early phragmoplast initiation (A-D). Distances of the margins of late phragmoplasts are indicated in pictures in  $\mu\text{m}$  (B,D). Bars: (A-D) 10  $\mu\text{m}$ .
